# Supplementary material for: Immobilization of metal hexacyanoferrates in chitin beads for cesium sorption: synthesis and characterization
Source: Royal Society of Chemistry journal article supplement (doi:10.1039/c4ta01128g), 2014-01-01
Supplement: c4ta01128g1.pdf [file c4ta01128g1.pdf]

### Additional Material section

Scheme 1: Synthesis procedure

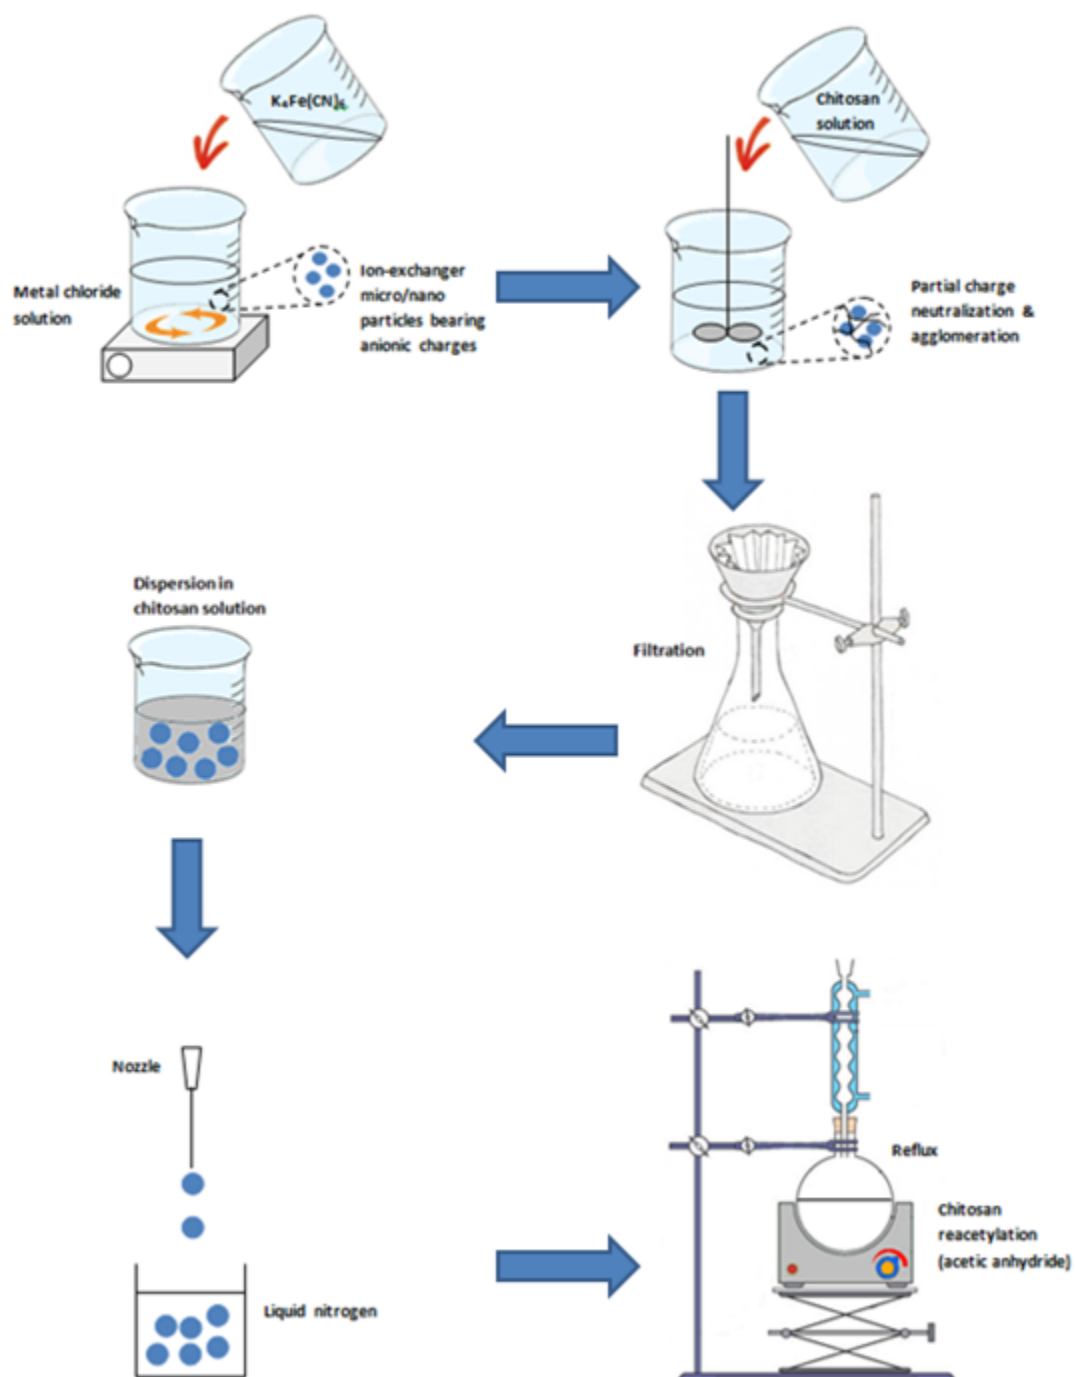

Scheme 2: Schematic structure of encapsulated material

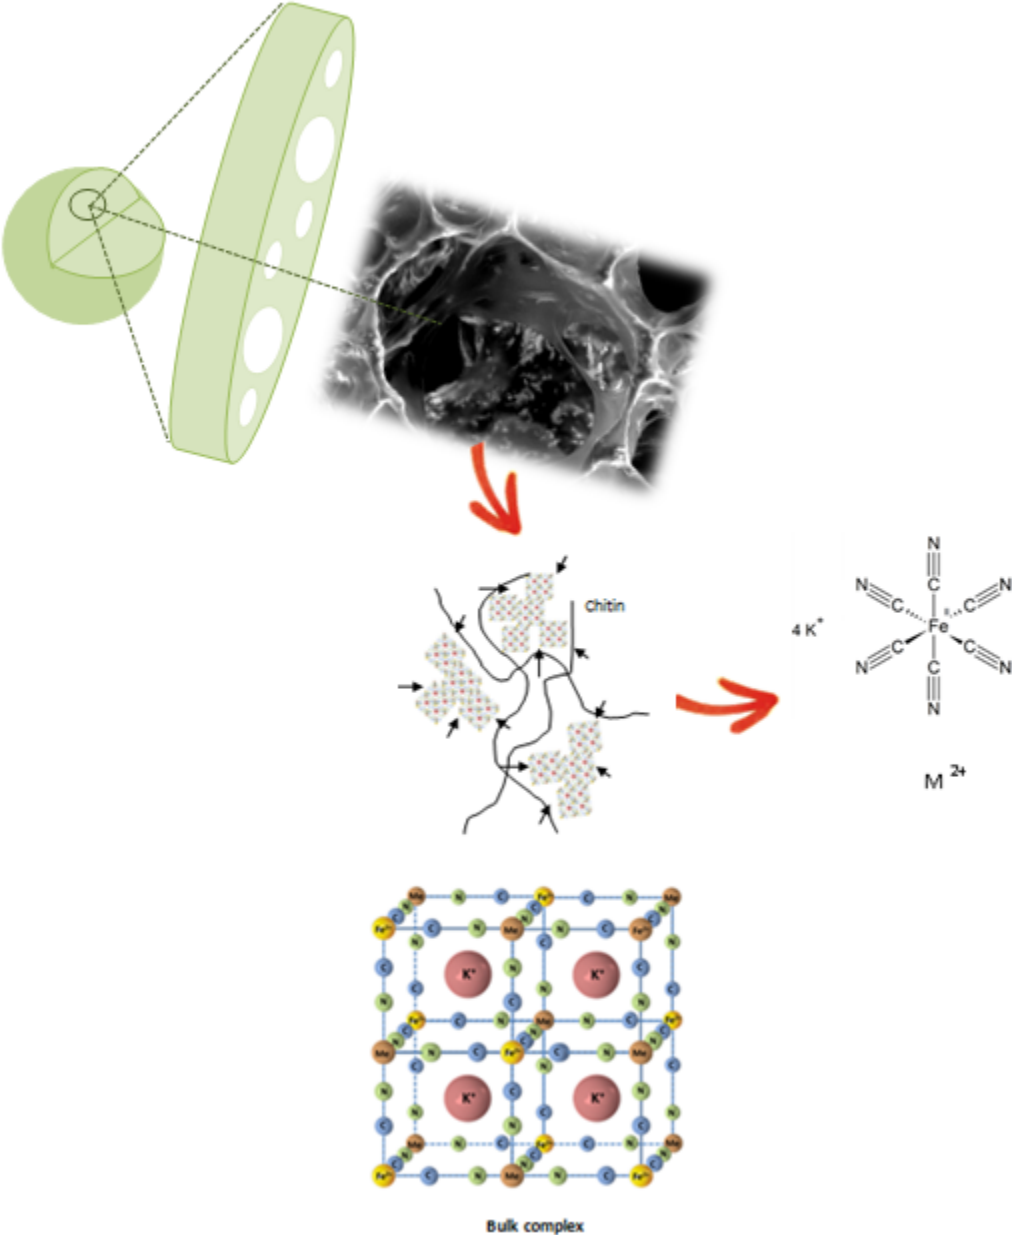

Table AM1: Zeta potential of suspensions before (bulk) and after chitosan stabilization (CSC, chitosan-stabilized complex; prior to encapsulation)

| HexaCNFe-Metal | Zeta potential (mV) |     |
|----------------|---------------------|-----|
|                | Bulk                | CSC |
| Ni             | -40                 | -1  |
| Zn             | -39                 | -31 |
| Co             | -39                 | -3  |
| Cu             | -51                 | -39 |
| Fe (PB)        | -17                 | -28 |

Table AM2: Particle size (analyzed by laser light scattering) on bulk compounds (HexaCNFe-Fe, BP, was not analyzable)

| HexaCNFe-Metal | Major particle size ( $\mu\text{m}$ ) | Maximum volume (%) |
|----------------|---------------------------------------|--------------------|
| Ni             | 27                                    | 6                  |
| Zn             | 0.25                                  | 9                  |
| Co             | 4                                     | 8                  |
| Cu             | 30                                    | 6                  |

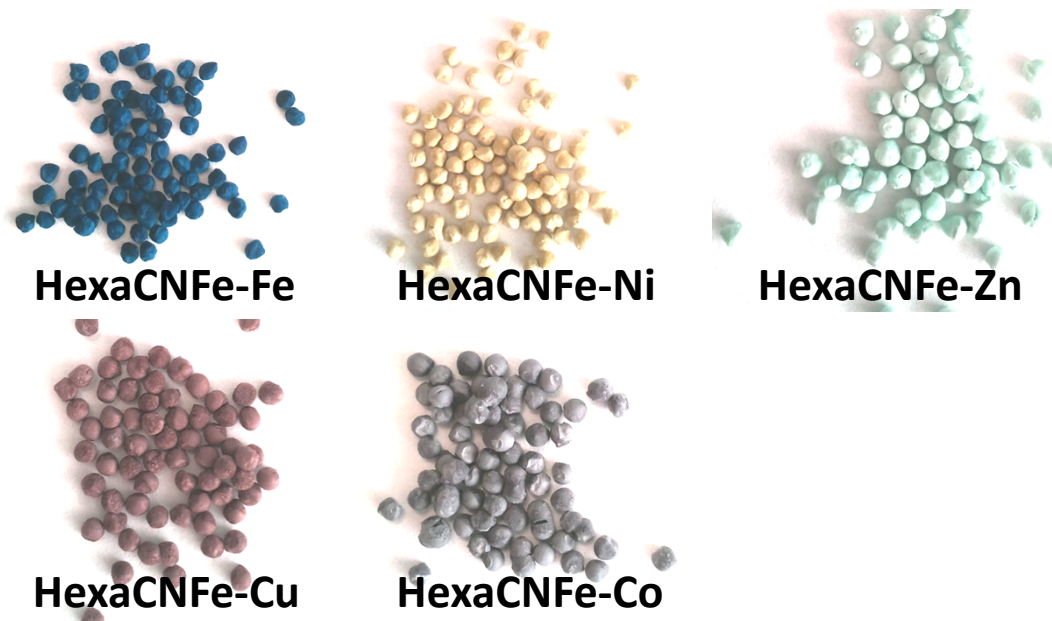

Figure AM1: Optical photographs of metal-potassium hexacyanoferrate/chitin composites.

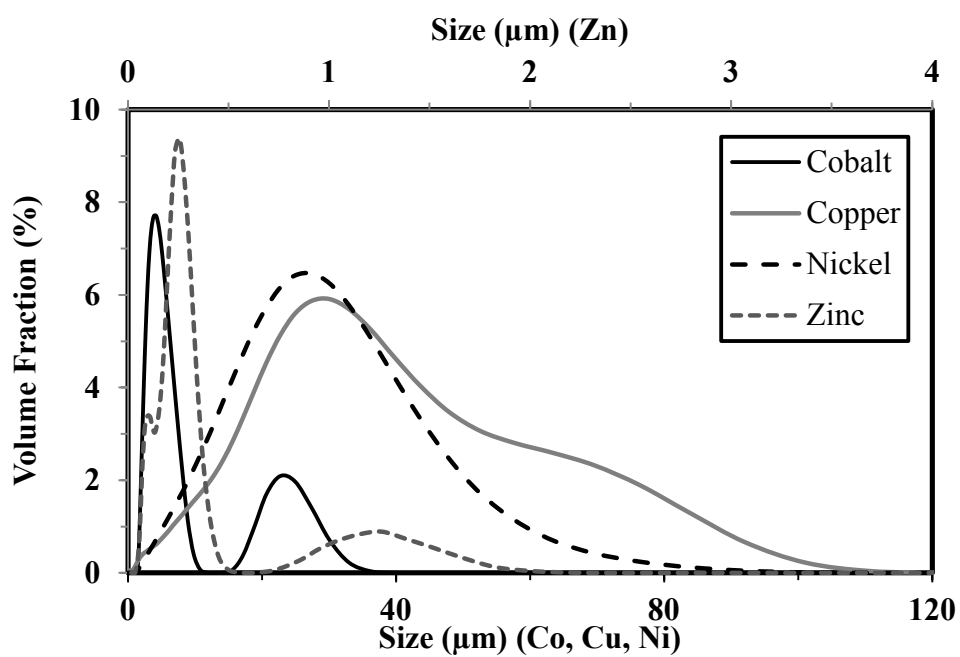

Figure AM2: Size analysis (laser light scattering) on bulk compounds (HexaCNFe-Fe, BP, was not analyzable).

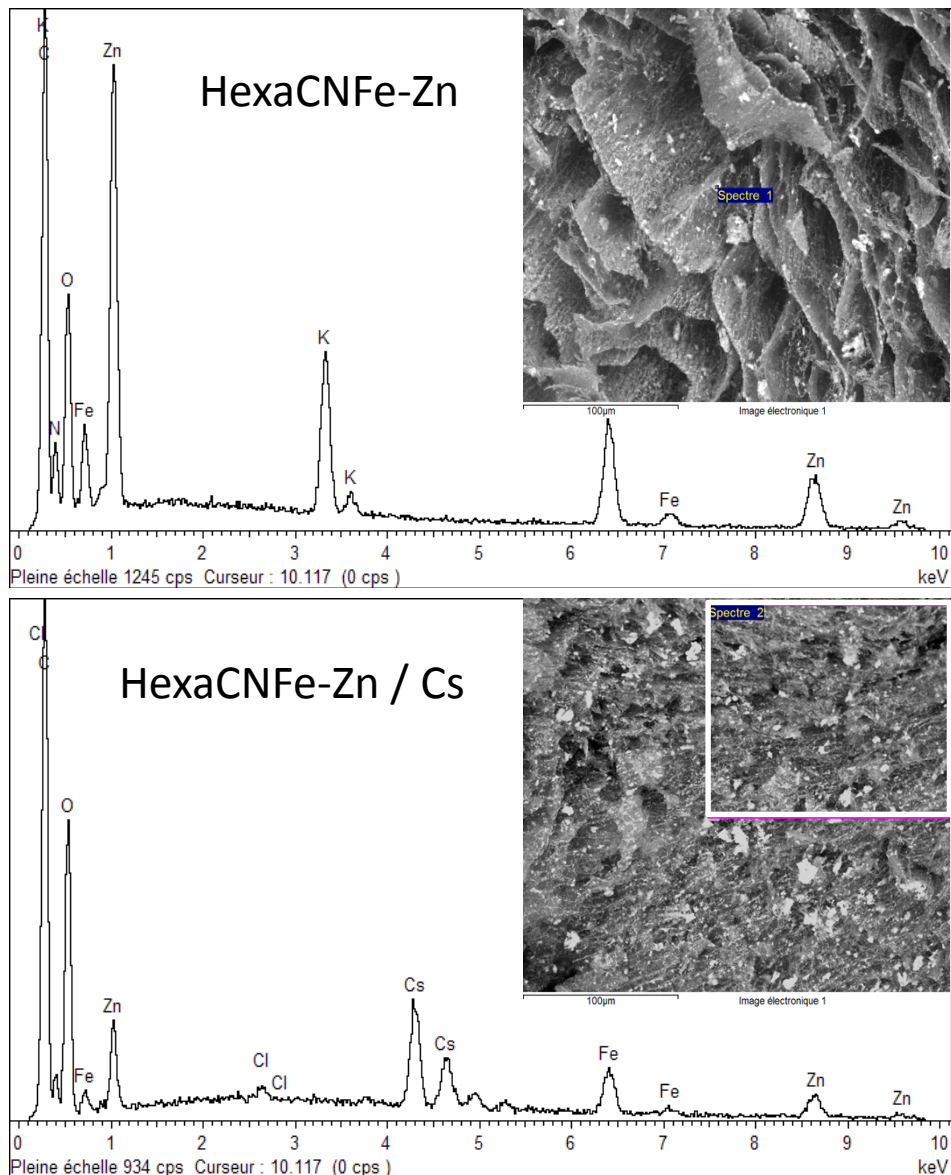

Figure AM3: SEM-EDX analysis of a cross-section of composite HexaCNF-Zn after Cs sorption (SEM photographs, X-ray spectra).

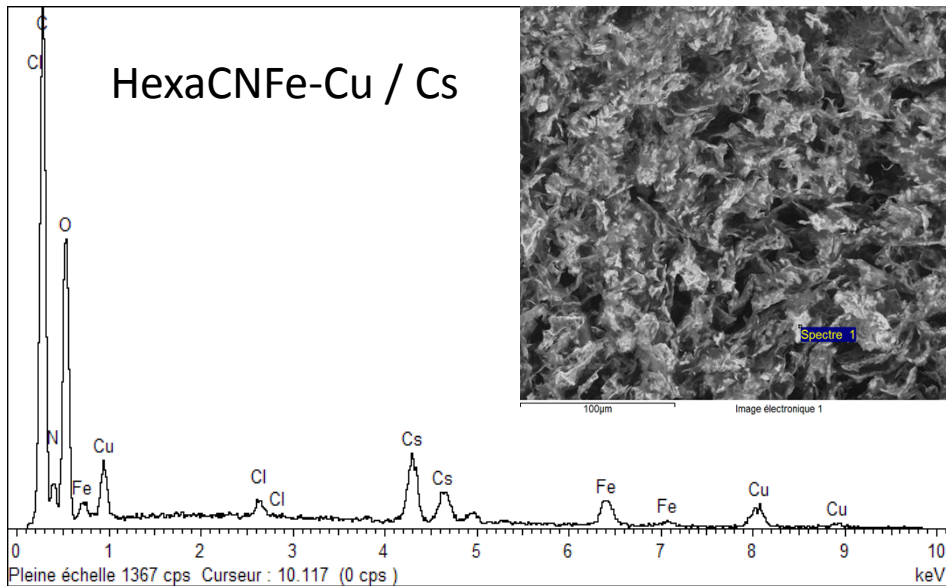

Figure AM4: SEM-EDX analysis of a cross-section of composite HexaCNF-Cu after Cs sorption (SEM photograph, X-ray spectrum).

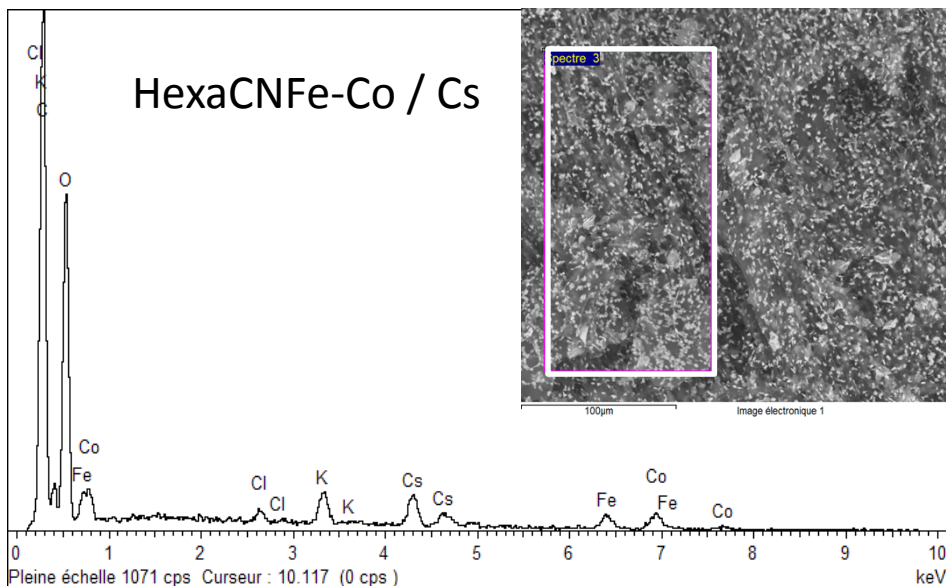

Figure AM5: SEM-EDX analysis of a cross-section of composite HexaCNF-Co after Cs sorption (SEM photograph, X-ray spectrum).

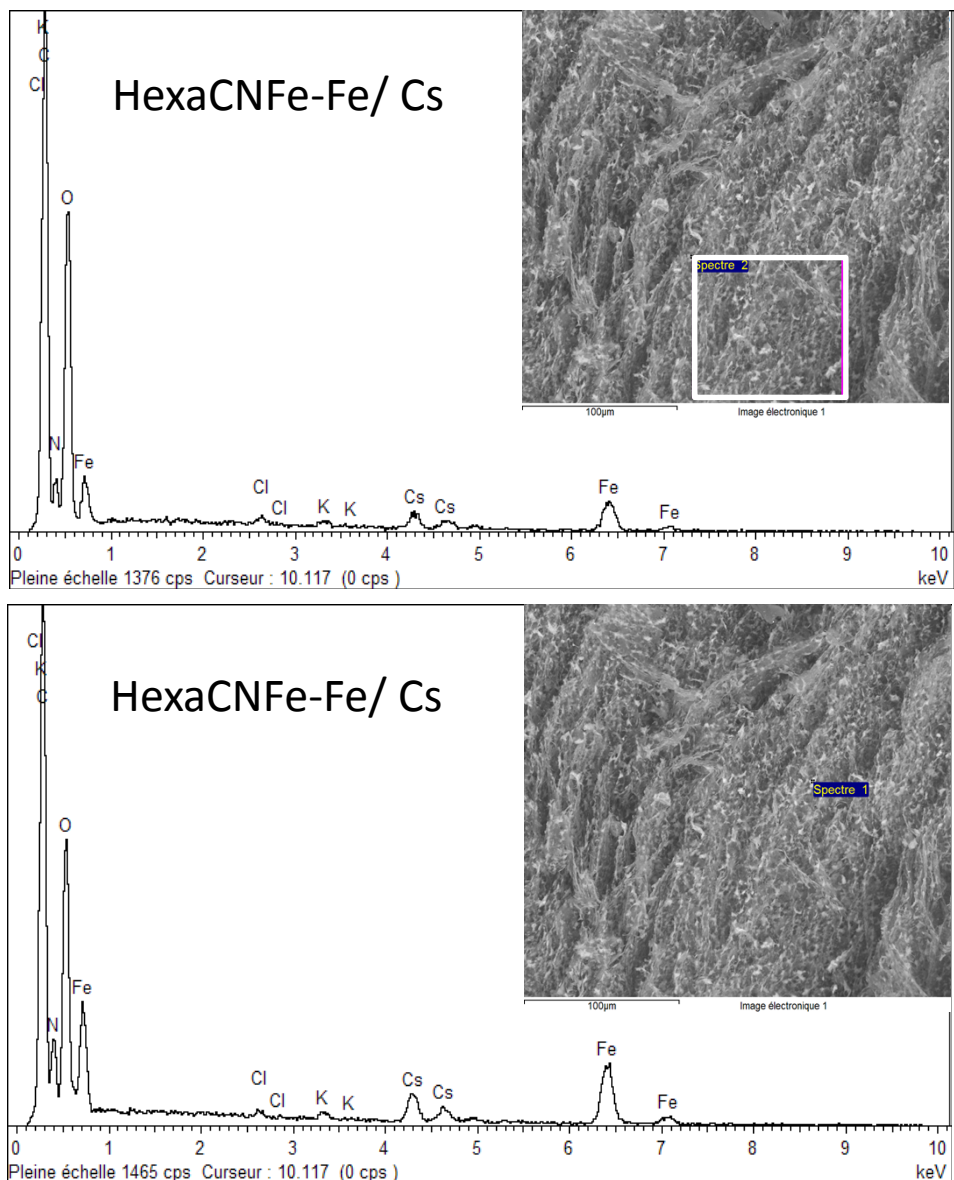

Figure AM6: SEM-EDX analysis of a cross-section of composite HexaCNF-Fe (Prussian Blue) after Cs sorption (SEM photographs, X-ray spectra).

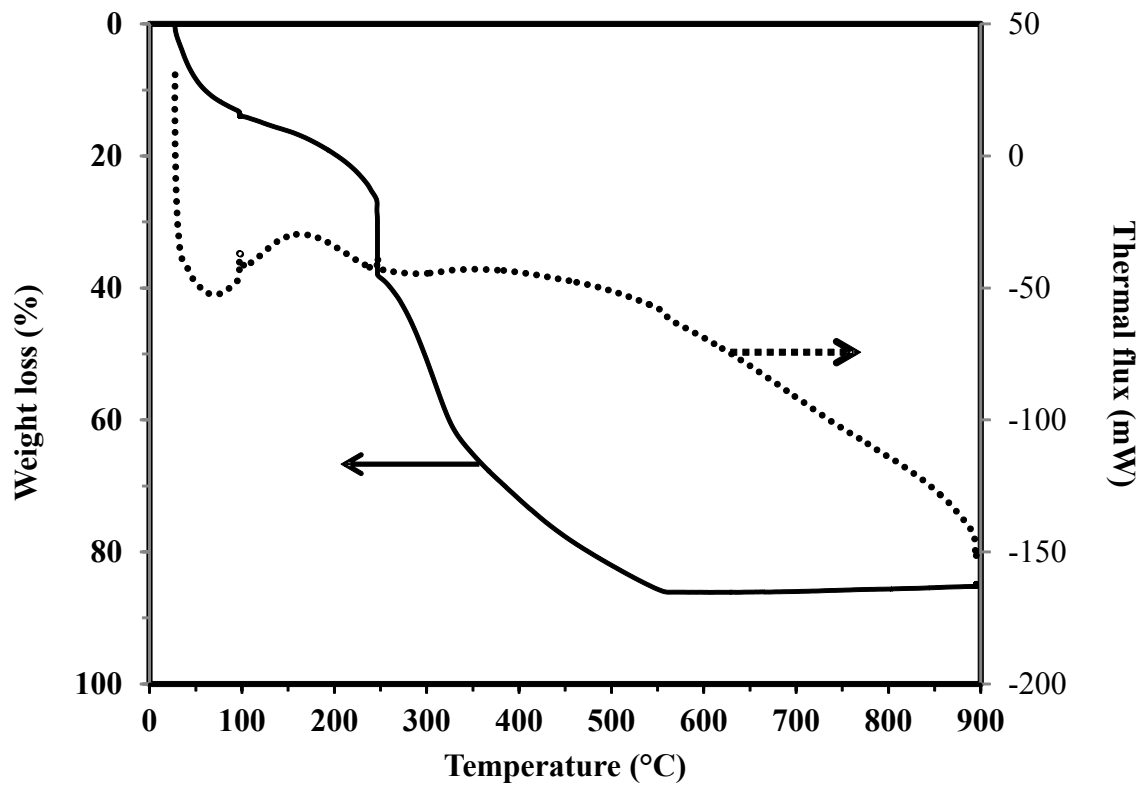

Figure AM7: ATG-ATD of HexaCNFe-Fe/chitin composite.



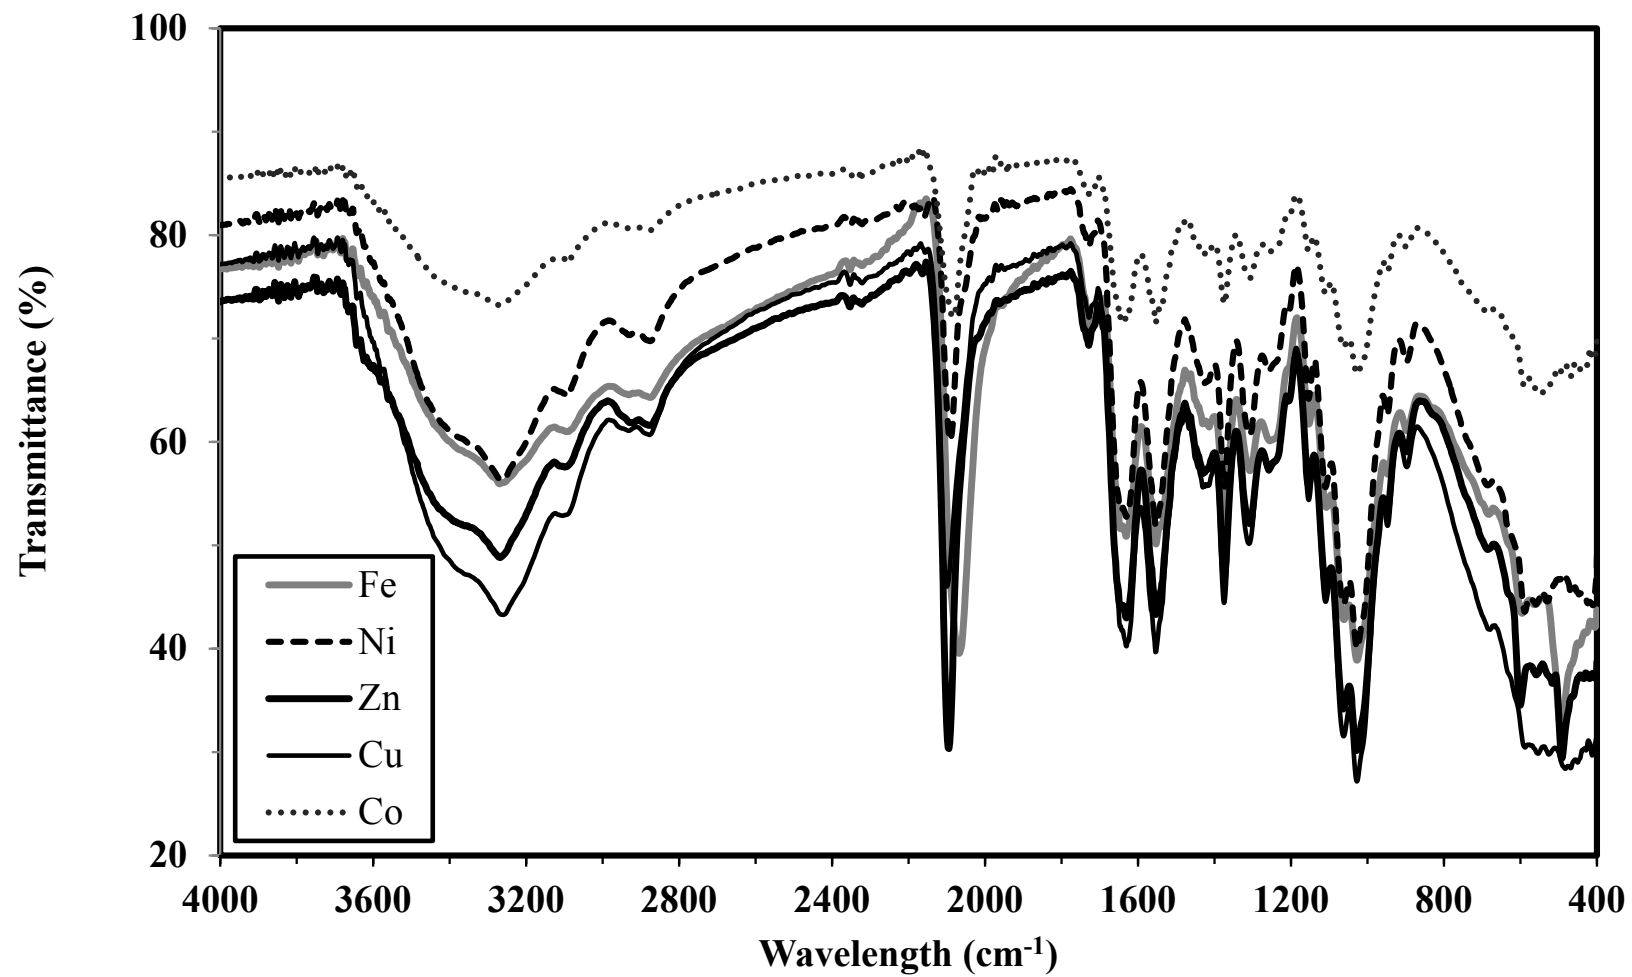

Figure AM8: FT-IR spectra of metal-potassium hexacyanoferrates/chitin composites.

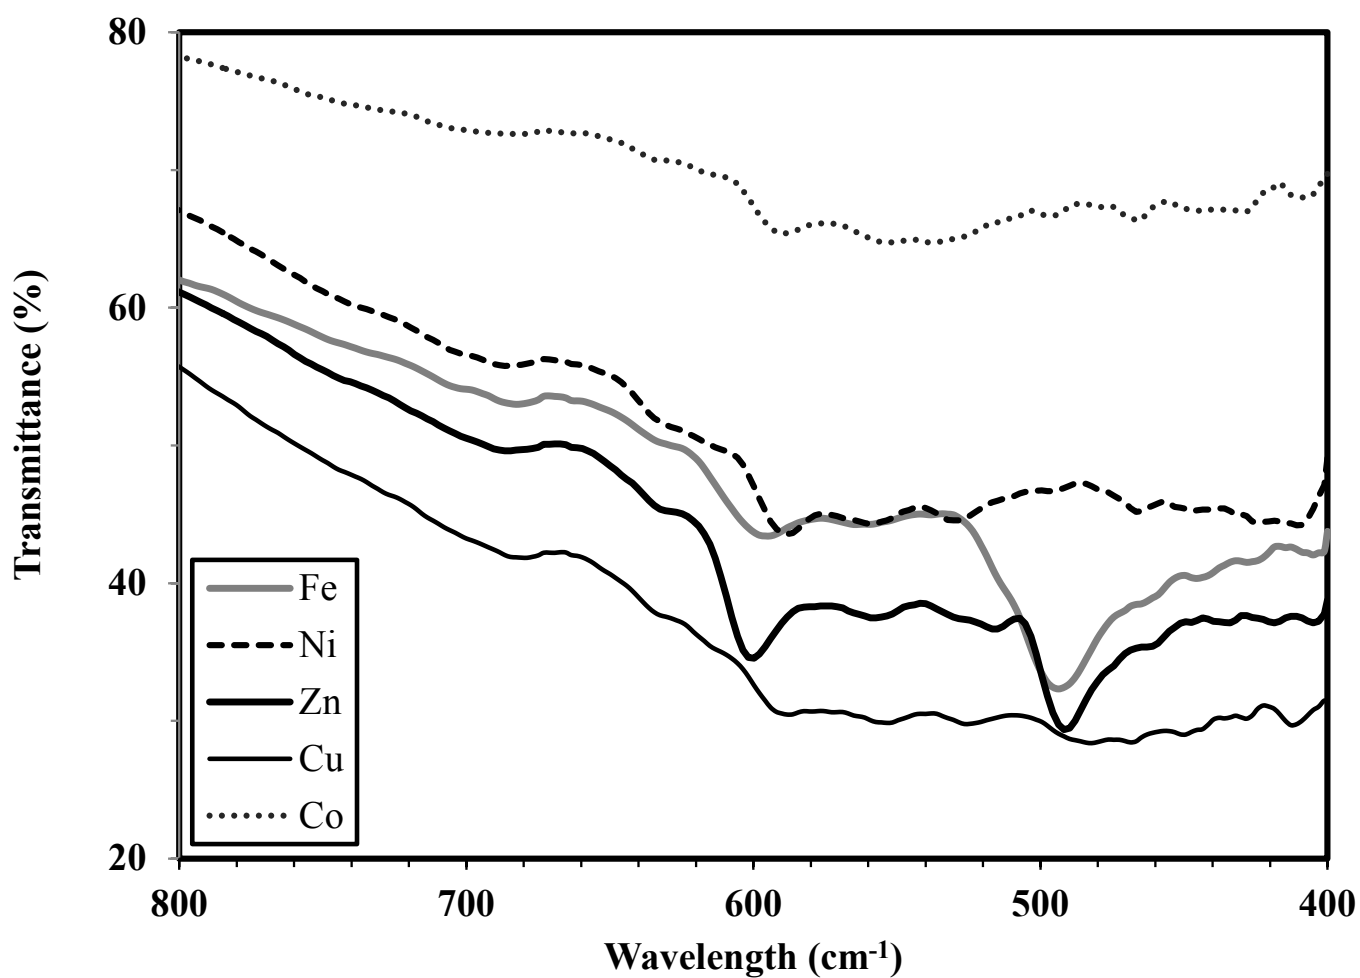

Figure AM9: FT-IR spectra of metal-potassium hexacyanoferrates/chitin composites (focus on wavenumber range: 800-400 cm<sup>-1</sup>; deformation mode for Fe-CN).

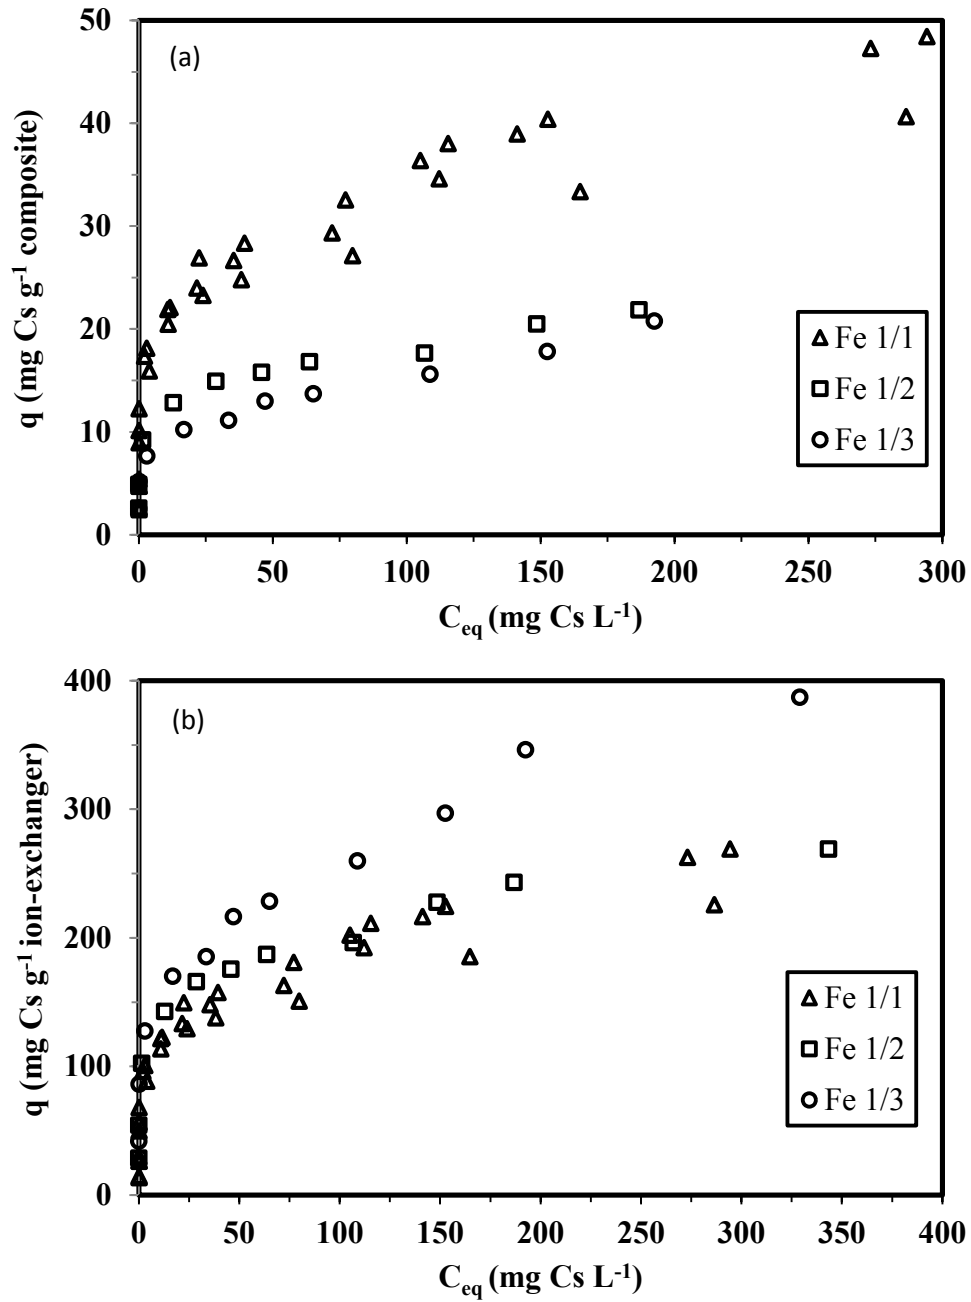

Figure AM10: Cs sorption isotherms using iron-potassium hexacyanoferrate/chitin composite with varying ion-exchanger content (1/n) in the composite and sorbent (a: sorption capacity referred to total mass of composite; b: sorption capacity referred to the mass of ion-exchanger)..

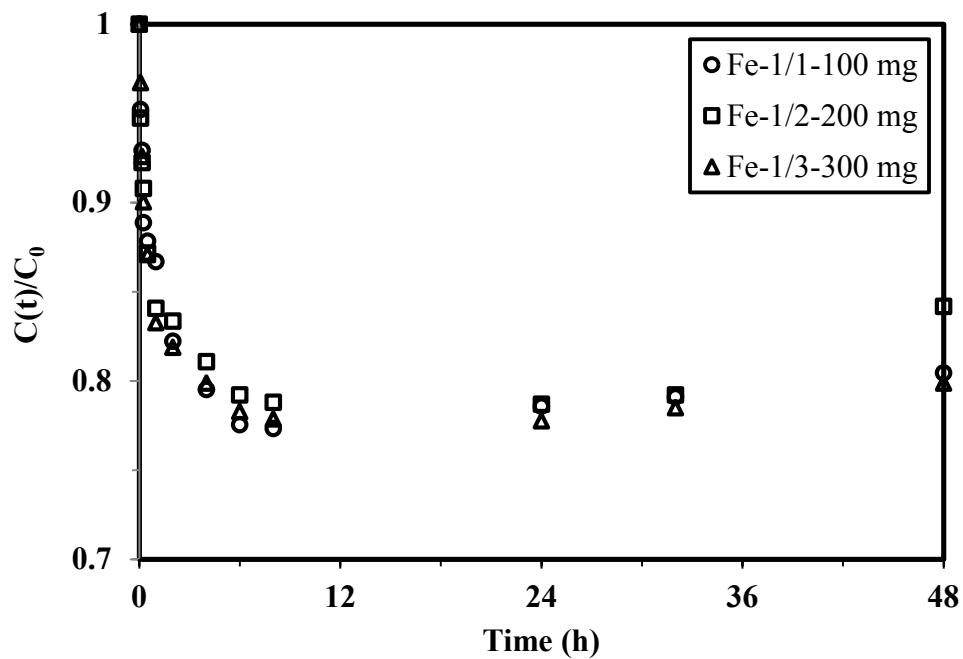

Figure AM11: Cs uptake kinetics using iron-potassium hexacyanoferrate/chitin composite with varying both ion-exchanger content (1/n) in the composite and sorbent dosage (N mg per L) (the final dosage of ion-exchanger in the solution remains constant).
